# Supplementary material for: Effect of chemical structure on secondary organic aerosol formation from C 12 alkanes
Source: Copernicus journal article supplement (doi:10.5194/acp-13-11121-2013), 2013-11-15
Supplement: Supplementary file 1 [file acp-13-11121-2013-supplement.pdf]

# Supplement for “Effect of chemical structure on secondary organic aerosol formation from C<sub>12</sub> alkanes”

L. D. Yee, J. S. Craven, C. L. Loza, K. A. Schilling, N. L. Ng, M. R. Canagaratna, P. J. Ziemann, R. C. Flagan, and J. H. Seinfeld

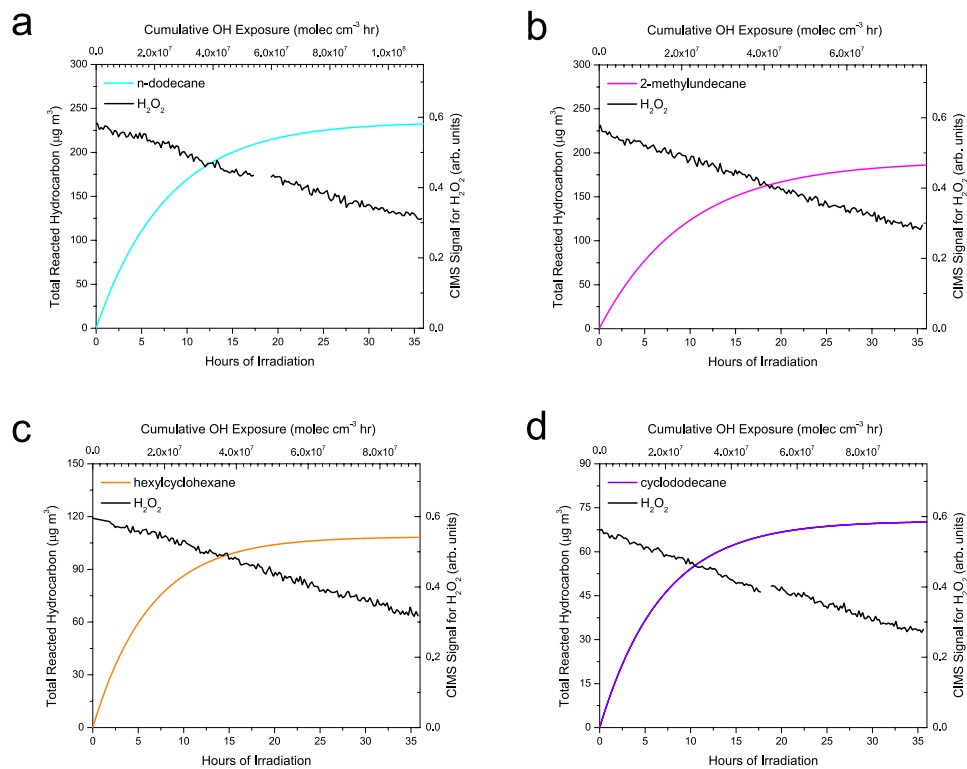

Figure S1: Total reacted hydrocarbon and  $H_2O_2$  decay over experiment duration for (a) n-dodecane, (b) 2-methylundecane, (c) hexylcyclohexane, and (d) cyclododecane photooxidation.
